# Supplementary material for: Scalable synthesis of spherical graphite/ZnO composite anodes for high-performance lithium-ion batteries
Source: Royal Society of Chemistry journal article supplement (doi:10.1039/d5ra09552b), 2026-01-01
Supplement: d5ra09552b1.pdf [file d5ra09552b1.pdf]

## Electronic Supplementary

### Scalable synthesis of spherical graphite/ZnO composite anodes for high-performance lithium-ion batteries

Thien Tri Vu<sup>1</sup>, Duy Van Lai<sup>2</sup>, Kien Trung Pham<sup>1</sup>, Phong Quang Le<sup>1</sup>, Thanh Huu Le<sup>1</sup>, Hung Tran Nguyen<sup>1</sup>, Trung-Dung Dang<sup>3</sup>, Duong Duc La<sup>1,\*</sup>

<sup>1</sup>*Institute of Materials, Biology and Environment, 17 Hoang Sam, Nghia Do, Ha Noi, 100000, Vietnam.*

<sup>2</sup>*Institute of Materials Science, Vietnam Academy of Science and Technology, No. 18 Hoang Quoc Viet Str., Nghia Do Ward, Hanoi, Vietnam.*

<sup>3</sup>*School of Chemistry and Life Sciences, Hanoi University of Science and Technology, 1 Dai Co Viet, HN 10000, Vietnam.*

Correspondence: duc.duong.la@gmail.com

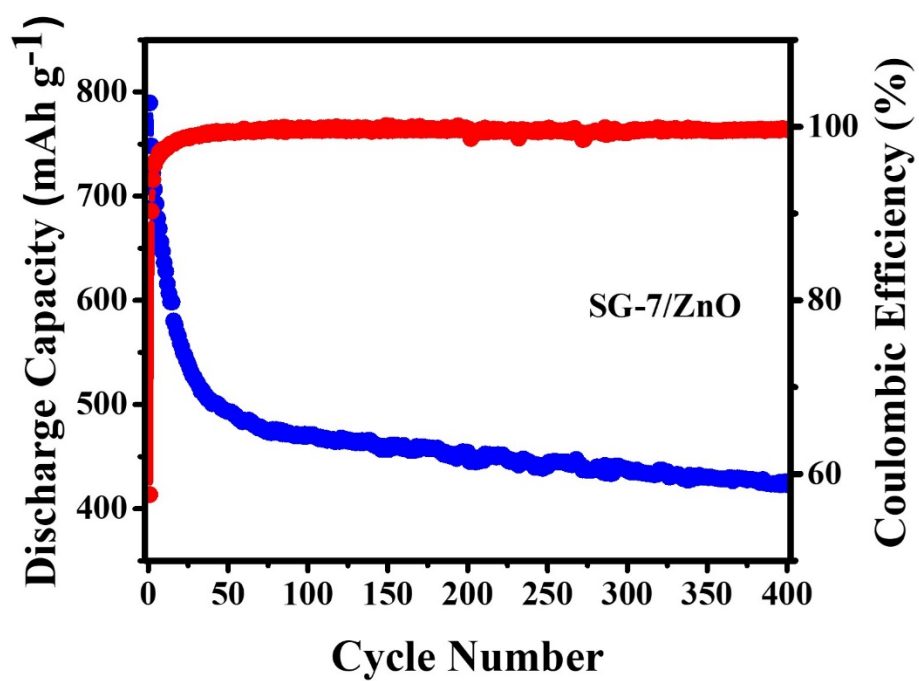

**Figure S1.** Long-term cycling stability of the SG-7/ZnO composite electrode at a current density of  $0.1 \text{ A g}^{-1}$  over more than 400 cycles.

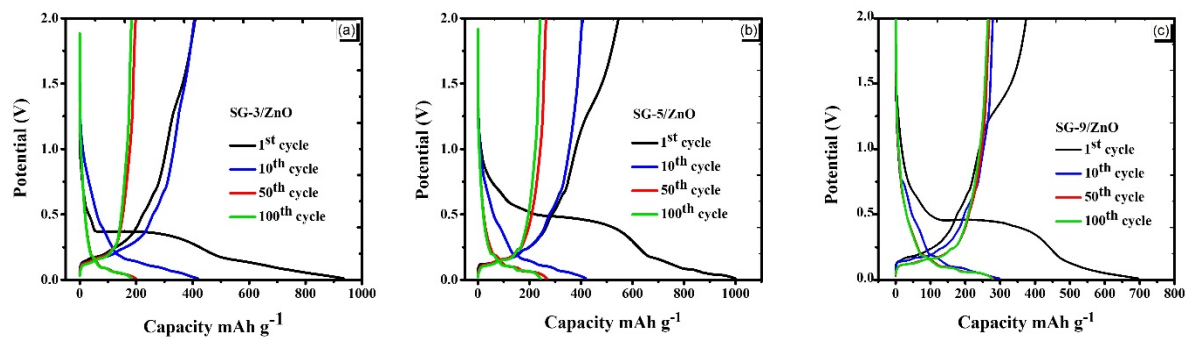

**Figure S2. Charge–discharge profiles of SG-x/ZnO electrodes at 100 mAh g<sup>-1</sup> (0.01–2.0 V) over selected cycles.**

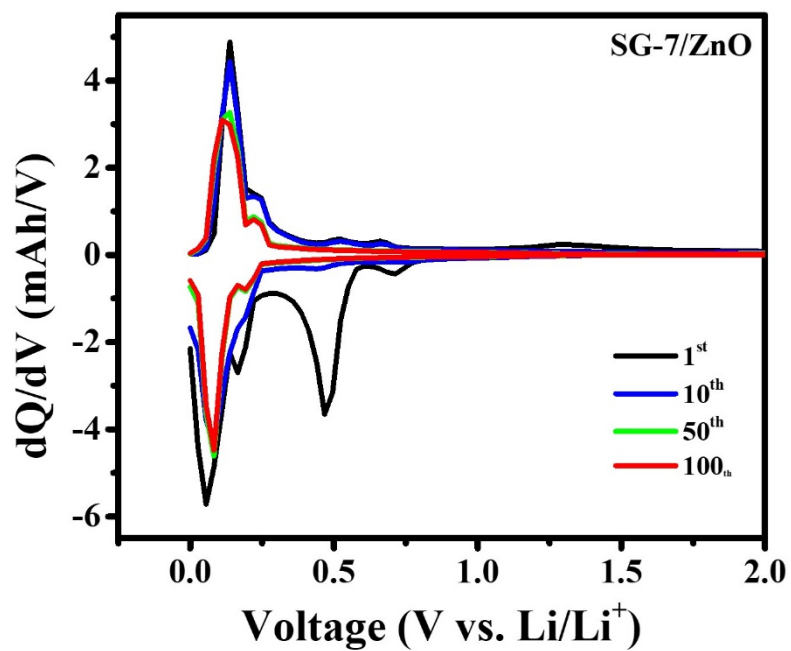

**Figure S3.** Differential capacity ( $dQ/dV$ ) curves of SG-7/ZnO electrode at 1<sup>st</sup> (black), 10<sup>th</sup> (blue), 50<sup>th</sup> (green), and 100<sup>th</sup> (red) cycles within 0.01–2.0 V vs. Li/Li<sup>+</sup>.
